# Supplementary material for: Accurate modeling of a biological nanopore with an extended continuum framework
Source: Royal Society of Chemistry journal article supplement (doi:10.1039/d0nr03114c), 2020-01-01
Supplement: d0nr03114c3.pdf [file d0nr03114c3.pdf]

This supplementary information was **updated** on **12/08/2020**.

## Accurate modeling of a biological nanopore with an extended continuum framework

Due to an erroneous scaling factor, the values of the chloride mobility in Fig. S2c were plotted approximately 10 times larger than their true values, and this has now been corrected. The original version of Figure S2c, along with the unaltered caption, is displayed below for future reference. In addition, Equation S25 contained an error: the parameters  $d_{cis}$  and  $d_{trans}$  should have been 6 and 3.3 nm, respectively. These mistakes have now been corrected.

Please contact [Nanoscale@rsc.org](mailto:Nanoscale@rsc.org) with any inquiries, citing the DOI: [doi.org/10.1039/D0NR03114C](https://doi.org/10.1039/D0NR03114C)

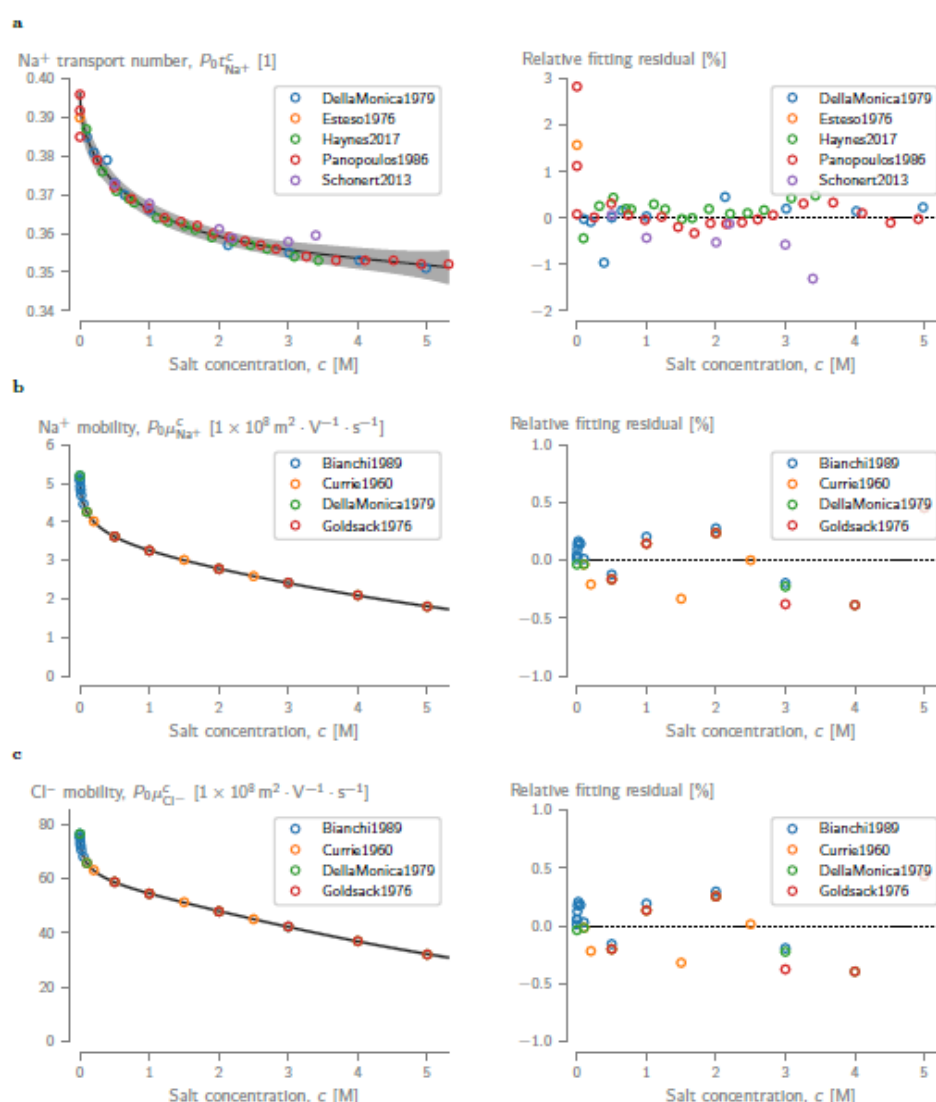

**Figure S2. Concentration dependency of the cation transport number and the ion electrophoretic mobilities in NaCl.** (a) Na<sup>+</sup> transport numbers and,<sup>4-8</sup> (b) Na<sup>+</sup> and (c) Cl<sup>-</sup> electrophoretic mobilities<sup>6,9-11</sup> as a function of the bulk NaCl concentration (left) and the relative residuals after fitting (right) of Eq. (S1). Circles represent the experimental data and solid lines the fitted equation with the grey shading as the 3σ confidence interval.

# Supporting Information:

## Accurate modeling of a biological nanopore with an extended continuum framework

Kherim Willems,<sup>†,‡</sup> Dino Ruić,<sup>¶,‡</sup> Florian Lucas,<sup>§</sup> Ujjal Barman,<sup>‡</sup> Niels Verellen,<sup>‡</sup>  
Johan Hofkens,<sup>†</sup> Giovanni Maglia,<sup>\*,§</sup> and Pol Van Dorpe<sup>\*,†,‡</sup>

<sup>†</sup>*KU Leuven, Department of Chemistry, Celestijnenlaan 200F, B-3001 Leuven, Belgium*

<sup>‡</sup>*imec, Kapeldreef 75, B-3001 Leuven, Belgium*

<sup>¶</sup>*KU Leuven, Department of Physics and Astronomy, Celestijnenlaan 200D, B-3001  
Leuven, Belgium*

<sup>§</sup>*University of Groningen, Groningen Biomolecular Sciences & Biotechnology Institute,  
9747 AG, Groningen, The Netherlands*

E-mail: g.maglia@rug.nl; Pol.VanDorpe@imec.be

# Contents

|          |                                                                                |             |
|----------|--------------------------------------------------------------------------------|-------------|
| <b>1</b> | <b>Extended materials and methods</b>                                          | <b>S-3</b>  |
| 1.1      | ClyA-AS mutations w.r.t. the wild-type . . . . .                               | S-3         |
| 1.2      | Fitting of the concentration and wall distance functions to electrolyte data . | S-3         |
| 1.2.1    | Concentration-dependent fitting functions for bulk electrolyte data. .         | S-4         |
| 1.2.2    | Wall distance-dependent fitting functions for molecular dynamics data. S-8     |             |
| 1.3      | Surface integration to compute pore averaged values . . . . .                  | S-12        |
| 1.4      | Weak forms of the ePNP-NS equations . . . . .                                  | S-13        |
| 1.5      | Estimating the bulk conductance of ClyA . . . . .                              | S-16        |
| <b>2</b> | <b>Extended results</b>                                                        | <b>S-18</b> |
| 2.1      | Effect of individual corrections to the ionic and water conductance . . . . .  | S-18        |
| 2.1.1    | Effect of disabling the wall distance corrections. . . . .                     | S-18        |
| 2.1.2    | Effect of disabling the concentration corrections. . . . .                     | S-18        |
| 2.1.3    | Effect of disabling the steric corrections. . . . .                            | S-19        |
| 2.2      | Tabulated ion selectivities . . . . .                                          | S-20        |
| 2.3      | Ionic current rectification . . . . .                                          | S-21        |
| 2.4      | Peak values of the radial potential profiles inside ClyA . . . . .             | S-22        |
| 2.5      | Comparison of the <i>lumen</i> diameters . . . . .                             | S-22        |
| 2.6      | Per-residue B-factors of the molecular dynamics trajectory . . . . .           | S-23        |
|          | <b>References</b>                                                              | <b>S-26</b> |

# 1 Extended materials and methods

## 1.1 ClyA-AS mutations w.r.t. the wild-type

The mutations required to convert the wild-type *S. typhii* ClyA to the more widely used ClyA-AS are given in Tab. S1.<sup>1</sup>

**Table S1.** Mutations of the ClyA-AS variant compared to the *S. typhii* wild-type.

| Mutant | Residue number |     |     |     |     |     |     |     |     |     |     |     |     |     |
|--------|----------------|-----|-----|-----|-----|-----|-----|-----|-----|-----|-----|-----|-----|-----|
|        | 8              | 15  | 38  | 57  | 67  | 87  | 90  | 95  | 99  | 103 | 118 | 119 | 124 | 125 |
| WT     | Lys            | Asn | Gln | Ala | Thr | Cys | Ala | Ala | Leu | Glu | Lys | Leu | Ile | Thr |
| AS     | Gln            | Ser | Lys | Glu | Val | Ala | Val | Ser | Gln | Gly | Arg | Ile | Val | Lys |
| Mutant | 136            | 166 | 172 | 185 | 212 | 214 | 217 | 224 | 227 | 244 | 276 | 285 | 290 |     |
|        |                |     |     |     |     |     |     |     |     |     |     |     |     |     |
| WT     | Val            | Phe | Lys | Val | Lys | Lys | Ser | Thr | Asn | Thr | Glu | Cys | Lys |     |
| AS     | Thr            | Tyr | Arg | Ile | Asn | Arg | Thr | Ser | Ala | Ala | Gly | Ser | Gln |     |

## 1.2 Fitting of the concentration and wall distance functions to electrolyte data

The properties of the ions and water molecules in the electrolyte depend strongly on the salt concentration ( $c$ ) and the distance from the protein wall ( $d$ ). To obtain reasonable estimates of these values for any given NaCl concentration or wall distance, we fitted a series of empirical polynomial functions (using non-linear regression with the ‘lmfit’ Python package<sup>2</sup>) to literature data—either bulk electrolyte experimental data for the concentration dependencies and molecular dynamics data for the wall distance dependencies. We fitted equations to concentration data for the ion self-diffusion coefficients ( $\mathcal{D}_i^c(c)$ , Eq. (S1) and Figs. S1a and S1b), the ion electrophoretic mobilities ( $\mu_i^c(c)$ , Eq. (S1) and Fig. S2b), and the cation transport number ( $t_{\text{Na}^+}^c(c)$ , Eq. (S1) and Fig. S2a), the electrolyte viscosity ( $\eta^c(c)$ , Eq. (S2) and Fig. S3a), the electrolyte density ( $\rho^c(c)$ , Eq. (S3) and Fig. S3b) and the electrolyte relative permittivity ( $\varepsilon_{r,f}^c(c)$ , Eq. (S4) and Fig. S3c). Wall distance parameters were determined

for ion self-diffusion coefficients ( $\mathcal{D}_i^w(d)$ , Eq. (S5) and Fig. S4a), the ion electrophoretic mobilities ( $\mu_i^w(d)$ , Eq. (S5) and Fig. S4a), and the electrolyte viscosity ( $\eta^w(d)$ , Eq. (S6) and Fig. S4b). All best-fit parameters can be found in Tab. S2, and the fitting functions are described below.

### 1.2.1 Concentration-dependent fitting functions for bulk electrolyte data.

**Diffusivity, mobility and transport number.** The NaCl concentration dependency data of ion self-diffusion coefficients, the ion electrophoretic mobilities and the cation trans-

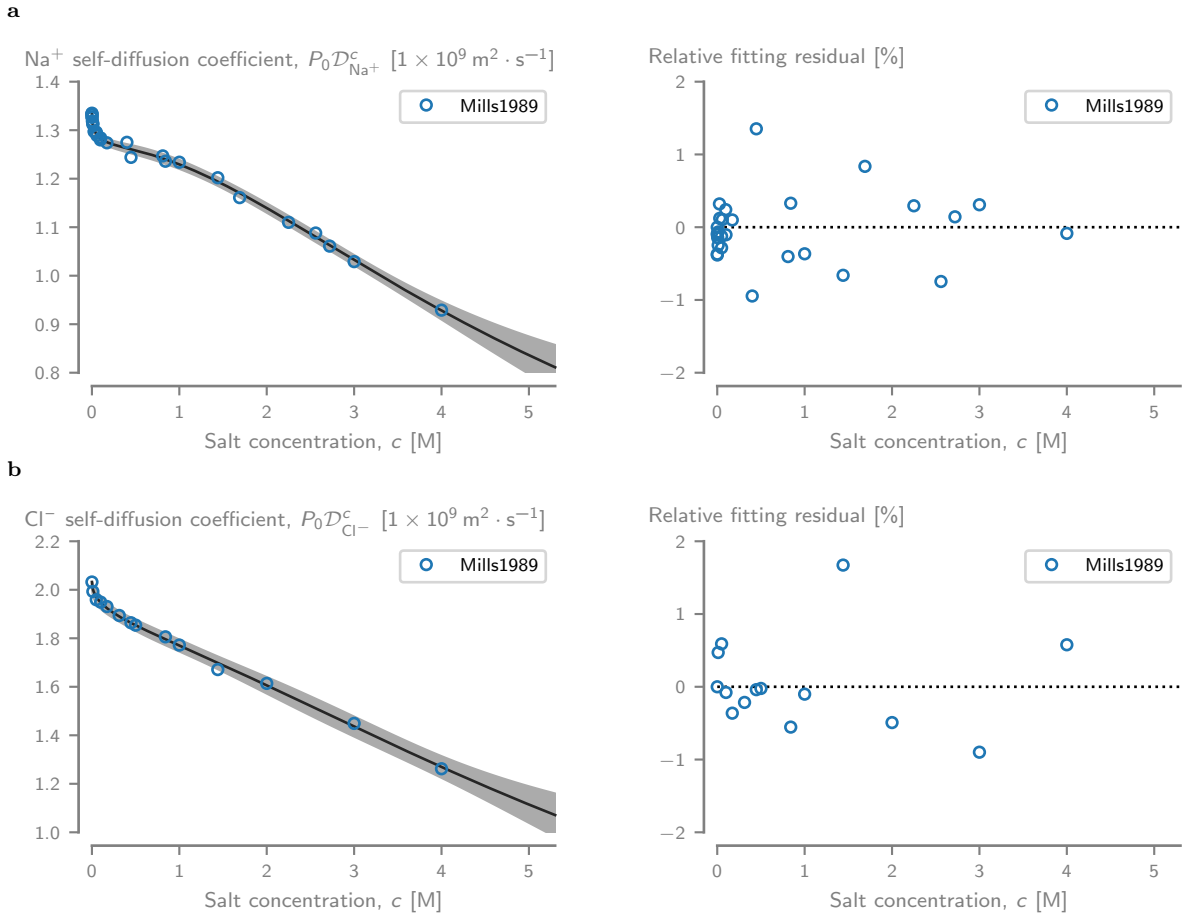

**Figure S1. Concentration dependency of ion self-diffusion coefficients in NaCl.** (a) Na<sup>+</sup> and (b) Cl<sup>-</sup> self-diffusion coefficients<sup>3</sup> as a function of the bulk NaCl concentration (left) and the relative residuals after fitting (right) of Eq. (S1). Circles represent the experimental data and solid lines the fitted equation with the grey shading as the  $3\sigma$  confidence interval.

port number were fitted to

$$X_i(c) = P_0 X_i^c(c) = P_0 [1 + P_1 c^{0.5} + P_2 c + P_3 c^{1.5} + P_4 c^2]^{-1} \quad (\text{S1})$$

with  $X$  either  $\mathcal{D}$  (diffusion),  $\mu$  (mobility) or  $t$  (transport number) and  $i$  either  $\text{Na}^+$  or  $\text{Cl}^-$ .  $P_0$  is the value at infinite dilution (*i.e.*,  $c = 0$  M) and fixed during fitting of parameters  $P_1$ ,  $P_2$ ,  $P_3$  and  $P_4$ .

**Viscosity.** The concentration dependency of the electrolyte viscosity was fitted to

$$\eta(c) = P_0 \eta^c(c) = P_0 [1 + P_1 c^{0.5} + P_2 c + P_3 c^2 + P_4 c^{3.5}] \quad (\text{S2})$$

with  $P_0$  the value at infinite dilution.

**Density.** The concentration dependency of the electrolyte density was fitted to

$$\varrho(c) = P_0 \varrho^c(c) = P_0 [1 + P_1 c + P_2 c^2] \quad (\text{S3})$$

with  $P_0$  the value at infinite dilution.

**Relative permittivity.** For the concentration dependency of the electrolyte relative permittivity, we used the microfield model developed by Gavish *et al.*<sup>12</sup>

$$\varepsilon_r(c) = P_0 \varepsilon_{r,f}^c(c) = P_0 \left[ 1 - \left( 1 - \frac{P_1}{P_0} \right) L \left( \frac{3P_2}{P_0 - P_1} c \right) \right] \quad (\text{S4})$$

where  $L$  is the Langevin function ( $L(x) = \coth(x) - 1/x$ ),  $P_0$  the value at infinite dilution,  $P_1$  the limiting permittivity ( $\varepsilon_{r,ms}$ ) and  $P_2$  the total excess polarization of the ions ( $\alpha$ ). Even though we fitted the equation to our literature dataset<sup>13</sup> ( $P_1 = 29.50 \pm 1.32$  and  $P_2 = 11.74 \pm 0.21$ ), we opted to make use of the parameters given by Gavish for NaCl at 298.15 K ( $P_1 = 30.08$  and  $P_2 = 11.5$ ).<sup>12</sup>

a

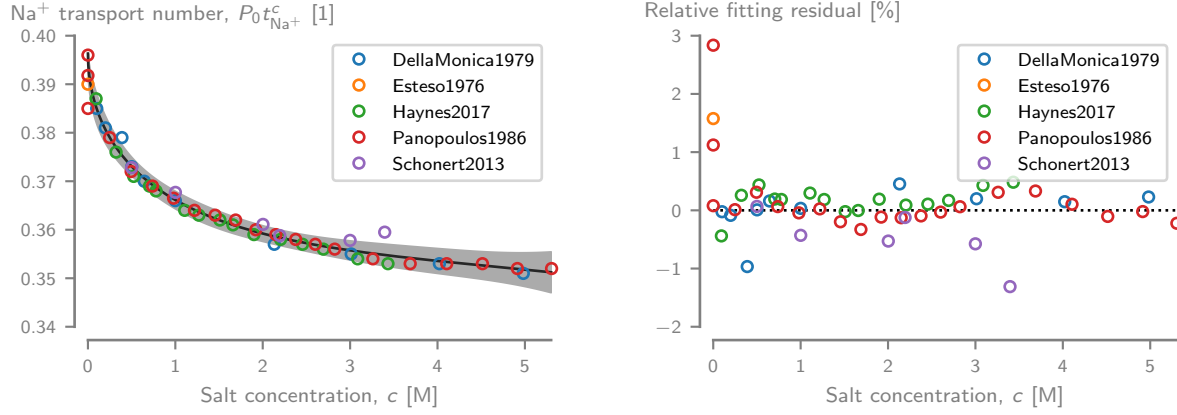

b

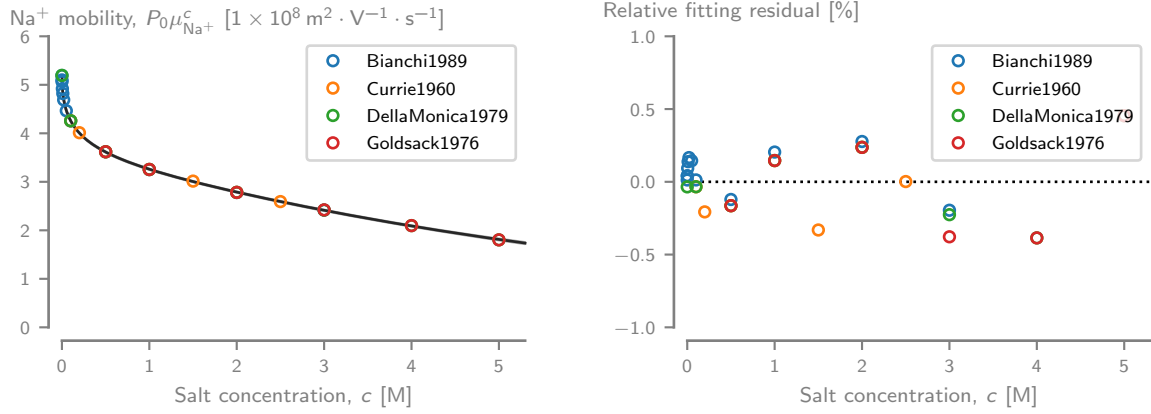

c

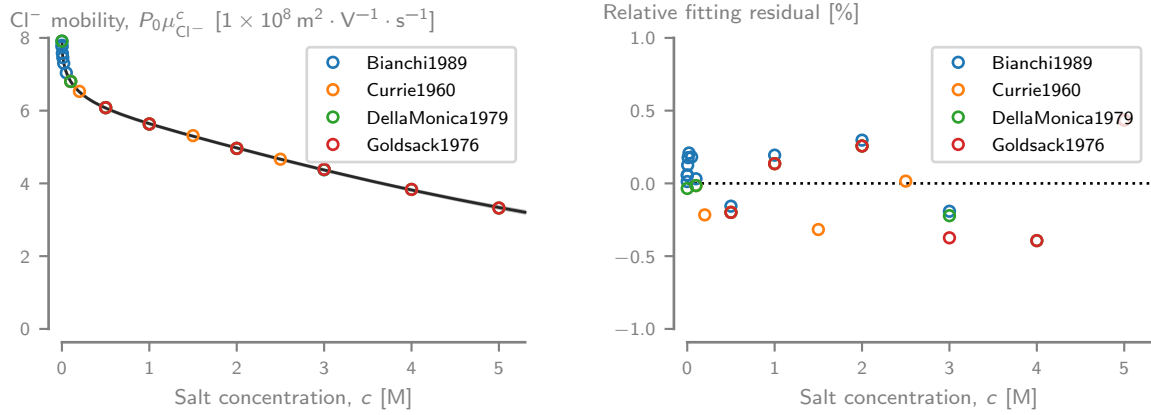

**Figure S2. Concentration dependency of the cation transport number and the ion electrophoretic mobilities in NaCl.** (a) Na<sup>+</sup> transport numbers and,<sup>4–8</sup> (b) Na<sup>+</sup> and (c) Cl<sup>-</sup> electrophoretic mobilities<sup>6,9–11</sup> as a function of the bulk NaCl concentration (left) and the relative residuals after fitting (right) of Eq. (S1). Circles represent the experimental data and solid lines the fitted equation with the grey shading as the 3 $\sigma$  confidence interval.

**a**

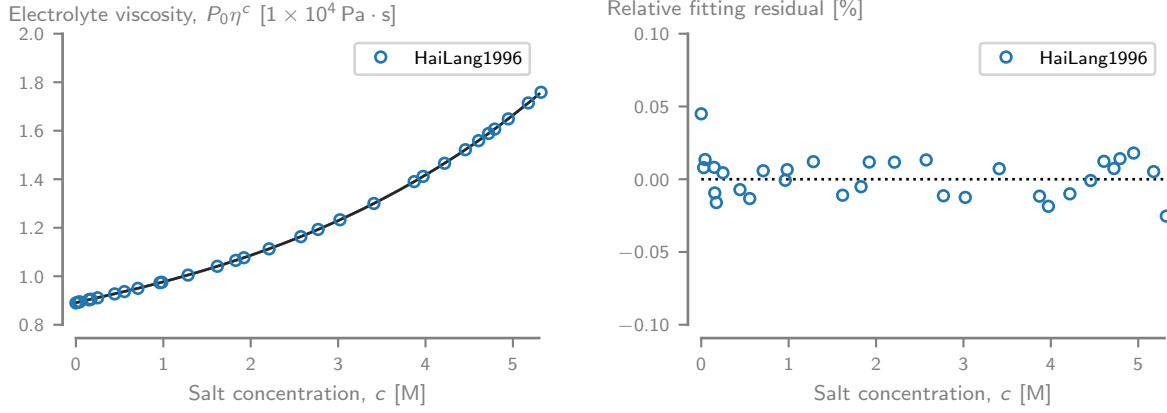

**b**

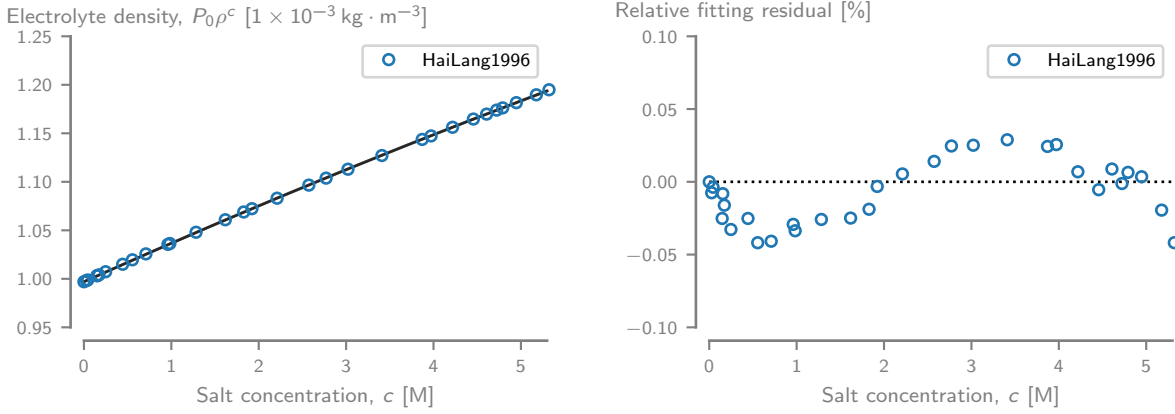

**c**

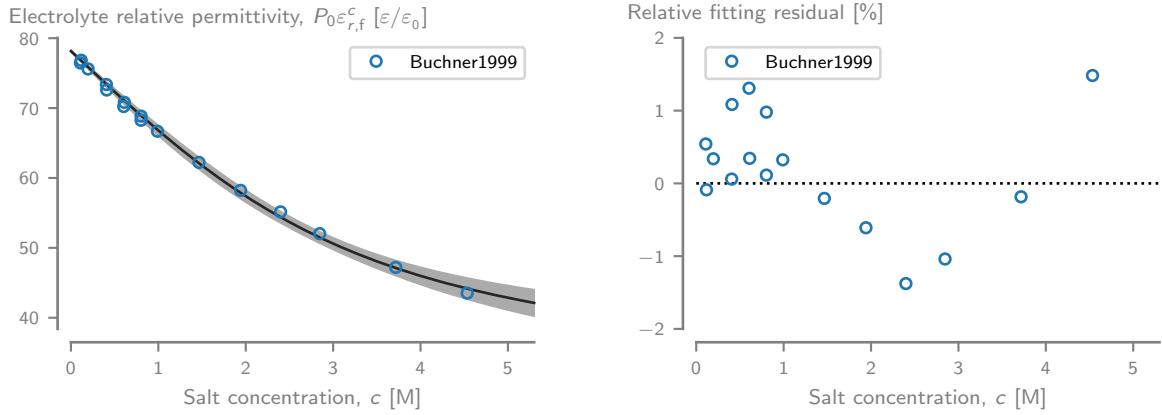

**Figure S3. Concentration dependency of the electrolyte viscosity, density and relative permittivity in NaCl.** (a) Viscosity,<sup>14</sup> (b) density<sup>14</sup> and (c) relative permittivity<sup>12,13</sup> as a function of the bulk NaCl concentration (left) and the relative residuals after fitting (right) to Eqs. (S2), (S3) and (S4), respectively. Circles represent the experimental data and solid lines the fitted equation with the grey shading as the  $3\sigma$  confidence interval.

### 1.2.2 Wall distance-dependent fitting functions for molecular dynamics data.

**Diffusivity and mobility.** The protein wall distance function used for the ion self-diffusion coefficients and the ion electrophoretic mobilities was taken from Simakov *et al.*<sup>15</sup>, who fitted it to the molecular dynamics data from Makarov *et al.*<sup>16</sup>. The function is a sigmoidal given by

$$X_i^w(d) = 1 - \exp -P_1(d - P_2) \quad (\text{S5})$$

with  $X$  either  $\mathcal{D}$  (diffusion) or  $\mu$  (mobility) and  $i$  either  $\text{Na}^+$  or  $\text{Cl}^-$  and  $P_1$  ( $a$ ) and  $P_2$  ( $r_0$ ) the fitting parameters. For  $P_1$ , we used the value determined by Simakov ( $6.2 \text{ nm}^{-1}$ ), but for  $P_2$  we opted to use a value of  $0.01 \text{ nm}$  instead of  $0.22 \text{ nm}$  proposed by Simakov<sup>15</sup> and further corroborated by Wilson *et al.*<sup>17</sup> We chose this smaller offset because Eq. (S5) quickly becomes negative beyond the offset  $P_2$ , resulting in unphysical values. Pederson *et al.* solved this by setting an arbitrary minimum positive value for the diffusion coefficient,<sup>18</sup> but this would result in a ‘dead’ zone of nearly  $0.2 \text{ nm}$  from each wall with a very low diffusivity (several orders of magnitude below the bulk value). This would make the current of a pore with a diameter smaller than  $0.5 \text{ nm}$  effectively zero, which has been shown experimentally to be not the case.<sup>19</sup> In addition,  $P_2$  represents the center-to-center distance between the ion and the nearest heavy atom, meaning that approximately half of the  $0.22 \text{ nm}$  would already be inside our geometry (*i.e.*, within the van der Waals radius of the heavy atom), and the other half would be inaccessible to ions due to excluded volume effects. As we are not modelling the latter, we opted to assign the full offset given by  $P_2$  to the heavy atom, effectively assuming that all ion-inaccessible space is taken into account already by our geometry. Our choice of parameters leads to a values of  $X_i^w(0 \text{ nm}) = 0.06$  (*i.e.*, at the wall boundary) and  $X_i^w(0.75 \text{ nm}) = 0.99$  (*i.e.*,  $0.75 \text{ nm}$  within the electrolyte, Fig. S4a), which roughly corresponds to the values reported by Wilson *et al.*<sup>17</sup>

**a**

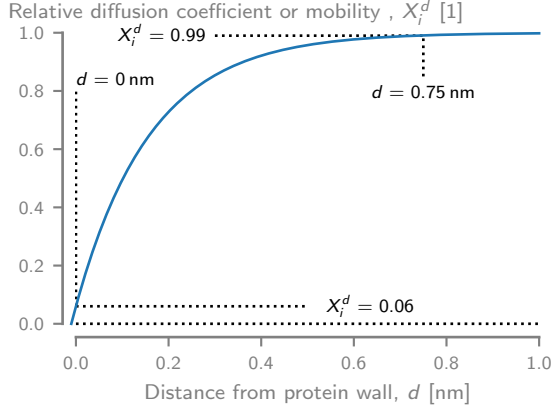

**b**

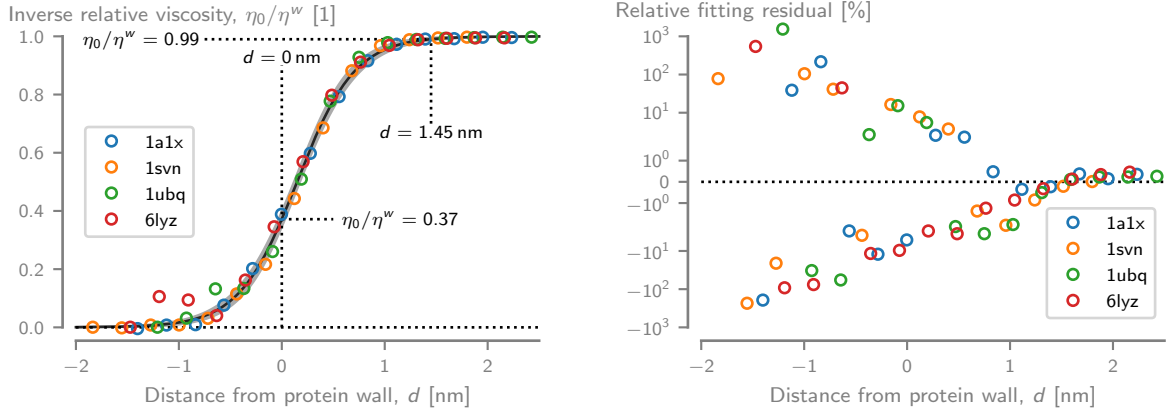

**Figure S4. Wall distance dependency of ion self-diffusion coefficients, mobilities and electrolyte viscosity.** (a) Relative ion self-diffusion coefficient and mobility,<sup>15–18</sup> and (b) inverse relative viscosity<sup>20</sup> as a function of the distance from the protein wall (left) and the relative residuals after fitting (right) to Eqs. (S5) and (S6), respectively. Circles represent the experimental data and solid lines the fitted equation with the grey shading as the  $3\sigma$  confidence interval.

**Viscosity.** Analogously to the diffusivity of ions, the movement of water molecules near a protein wall is also hampered,<sup>16</sup> resulting in substantially higher viscosities.<sup>20</sup> To model this, we fitted the following logistic curve to the molecular dynamics data from Pronk *et al.*<sup>20</sup>

$$\eta^w(d) = 1 + \exp(-P_1(d - P_2)) \quad (\text{S6})$$

with  $P_1$  and  $P_2$  the fitting parameters, representing the slope of the sigmoidal and the offset of the sigmoid's center from 0, respectively. Prior to the fitting, the viscosity data for all proteins was offset using by hydrodynamic radius, such that  $d = 0$  nm represents

the mean distance from the wall for each protein, regardless of its size. Additionally, we normalized and inverted the relative viscosities ( $\eta_0/\eta^w$ ) allowing us to fit values between 0 and 1. Our parameters result in a values of  $\eta_0/\eta^w(0 \text{ nm}) = 0.37$  (*i.e.*, at the protein wall) and  $\eta_0/\eta^w(1.45 \text{ nm}) = 0.99$  (*i.e.*, 1.45 nm within the electrolyte, Fig. S4b).

**Table S2.** Overview of the NaCl fitting parameters used for interpolation.

| Property                         | Eq.      | Infinite dilution value |                                                                        | Fitting parameters             |                                 |                                 |                                 | $R^2$   | References |
|----------------------------------|----------|-------------------------|------------------------------------------------------------------------|--------------------------------|---------------------------------|---------------------------------|---------------------------------|---------|------------|
|                                  |          | $P_0$                   | Unit                                                                   | $P_1$                          | $P_2$                           | $P_3$                           | $P_4$                           |         |            |
| $\mathcal{D}_{\text{Na}^+}^c(c)$ | Eq. (S1) | 1.334                   | $1 \times 10^{-9} \text{ m}^2 \cdot \text{s}^{-1}$                     | $2.02 \pm 0.14 \times 10^{-1}$ | $-3.05 \pm 0.41 \times 10^{-1}$ | $2.19 \pm 0.38 \times 10^{-1}$  | $-3.13 \pm 1.08 \times 10^{-2}$ | $>0.99$ | 3          |
| $\mathcal{D}_{\text{Cl}^-}^c(c)$ | Eq. (S1) | 2.032                   | $1 \times 10^{-9} \text{ m}^2 \cdot \text{s}^{-1}$                     | $1.49 \pm 0.30 \times 10^{-1}$ | $-4.94 \pm 9.04 \times 10^{-2}$ | $3.40 \pm 8.26 \times 10^{-2}$  | $1.43 \pm 2.30 \times 10^{-2}$  | $>0.99$ | 3          |
| $t_{\text{Na}^+}^c(c)$           | Eq. (S1) | 0.3963                  | n.a.                                                                   | $9.38 \pm 1.64 \times 10^{-2}$ | $2.86 \pm 3.24 \times 10^{-3}$  | $-1.88 \pm 6.52 \times 10^{-2}$ | $4.51 \pm 2.75 \times 10^{-3}$  | 0.98    | 4–8        |
| $\mu_{\text{Na}^+}^c(c)$         | Eq. (S1) | 5.192                   | $1 \times 10^{-8} \text{ m}^2 \cdot \text{s}^{-1} \cdot \text{V}^{-1}$ | $7.91 \pm 0.06 \times 10^{-1}$ | $-3.53 \pm 0.17 \times 10^{-1}$ | $1.46 \pm 0.15 \times 10^{-1}$  | $9.23 \pm 3.89 \times 10^{-3}$  | $>0.99$ | 6,9–11     |
| $\mu_{\text{Cl}^-}^c(c)$         | Eq. (S1) | 7.909                   | $1 \times 10^{-8} \text{ m}^2 \cdot \text{s}^{-1} \cdot \text{V}^{-1}$ | $6.29 \pm 0.06 \times 10^{-1}$ | $-4.29 \pm 0.17 \times 10^{-1}$ | $2.12 \pm 0.14 \times 10^{-1}$  | $-1.07 \pm 0.37 \times 10^{-2}$ | $>0.99$ | 6,9–11     |
| $\eta^c(c)$                      | Eq. (S2) | 0.8904                  | $1 \times 10^{-4} \text{ Pa} \cdot \text{s}$                           | $7.56 \pm 0.27 \times 10^{-3}$ | $7.77 \pm 0.04 \times 10^{-2}$  | $1.19 \pm 0.01 \times 10^{-2}$  | $5.95 \pm 0.35 \times 10^{-4}$  | $>0.99$ | 14         |
| $\varrho^c(c)$                   | Eq. (S3) | 0.997                   | $1 \times 10^3 \text{ kg} \cdot \text{m}^{-3}$                         | $4.06 \pm 0.01 \times 10^{-2}$ | $-6.39 \pm 0.16 \times 10^{-4}$ |                                 |                                 | $>0.99$ | 14         |
| $\varepsilon_{r,i}^c(c)$         | Eq. (S4) | 78.15                   | n.a.                                                                   | $3.08 \pm 0.00 \times 10^1$    | $1.15 \pm 0.00 \times 10^1$     |                                 |                                 |         | 12,13      |
| $\mathcal{D}_i^w(d)$             | Eq. (S5) |                         |                                                                        | 6.2                            | 0.01                            |                                 |                                 |         | 15,16,18   |
| $\mu_i^w(d)$                     | Eq. (S5) |                         |                                                                        | 6.2                            | 0.01                            |                                 |                                 |         | 15,16,18   |
| $\eta^w(d)$                      | Eq. (S6) |                         |                                                                        | $3.36 \pm 0.23$                | $1.47 \pm 0.23 \times 10^{-1}$  |                                 |                                 | 0.97    | 20         |

### 1.3 Surface integration to compute pore averaged values

The average pore values for quantity of interest  $X$  was computed by Eq. (S7)

$$\langle X \rangle_\alpha = \frac{\iint_{V_\alpha} \beta_\alpha X \, dr \, dz}{\iint_{V_\alpha} \beta_\alpha \, dr \, dz}, \quad (\text{S7})$$

where

$$\alpha = \begin{cases} \text{PT,} & d \geq 0 \text{ nm, average over the entire pore} \\ \text{PB,} & d > 0.5 \text{ nm, average over the pore 'bulk'} \\ \text{PS,} & d \leq 0.5 \text{ nm, average over the pore 'surface'} \end{cases} \quad (\text{S8})$$

and

$$\beta_{\text{PT}} = \begin{cases} 1, & \text{if } -1.85 \leq z \leq 12.25 \text{ and } r \leq r_p(z) \\ 0, & \text{otherwise} \end{cases} \quad (\text{S9})$$

$$\beta_{\text{PB}} = \begin{cases} 1, & \text{if } -1.85 \leq z \leq 12.25 \text{ and } r \leq r_p(z) \text{ and } d > 0.5 \\ 0, & \text{otherwise} \end{cases} \quad (\text{S10})$$

$$\beta_{\text{PS}} = \begin{cases} 1, & \text{if } -1.85 \leq z \leq 12.25 \text{ and } r \leq r_p(z) \text{ and } d \leq 0.5 \\ 0, & \text{otherwise} \end{cases} \quad (\text{S11})$$

with  $d$  the distance from the nanopore wall and  $r_p(z)$  is the radius of the pore at height  $z$ .

## 1.4 Weak forms of the ePNP-NS equations

To solve partial differential equations with the finite element method, we must derive their weak form. This is achieved through multiplication of the equation with an arbitrary test function and integration over their relevant domains and boundaries (Fig. S5). The full computational domain of our model ( $\Omega$ ) is subdivided into domains for the pore ( $\Omega_p$ ), the lipid bilayer ( $\Omega_m$ ) and the electrolyte reservoir ( $\Omega_w$ ). The relevant boundaries of these domains are also indicated, i.e. the reservoir's exterior edges at the *cis* ( $\Gamma_{w,c}$ ) and *trans* ( $\Gamma_{w,t}$ ) sides, the outer edge of the lipid bilayer ( $\Gamma_m$ ) and the interface of the fluid with the nanopore and the bilayer ( $\Gamma_{p+m}$ ).

The following paragraphs detail the equations that were used in this paper, together with their corresponding weak forms.

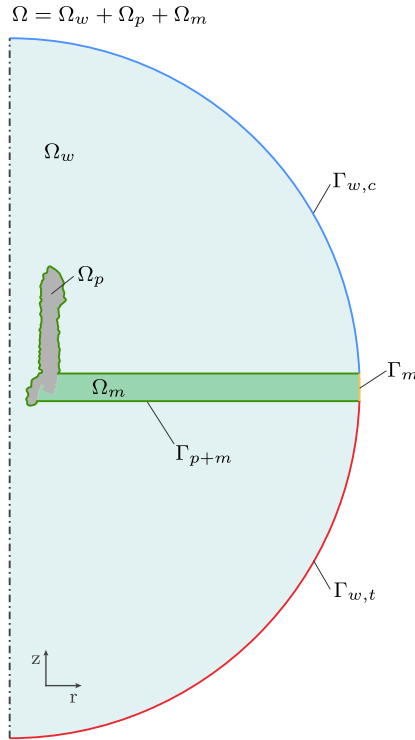

**Figure S5. Computational domains and boundaries.** The full computational domain ( $\Omega$ ) of the model is subdivided into various subdomains ( $\Omega_x$ ) and their limiting boundaries ( $\Gamma_x$ ).

**Poisson equation.** The global potential distribution is described by the Poisson equation (PE)<sup>21</sup>

$$\nabla \cdot \mathbf{D} = -(\rho_{\text{pore}}^f + \rho_{\text{ion}}) \quad \text{with } \mathbf{D} = \varepsilon_0 \varepsilon_r \nabla \varphi, \quad (\text{S12})$$

with  $\mathbf{D}$  the electrical displacement field,  $\varphi$  the electric potential,  $\varepsilon_0$  the vacuum permittivity ( $8.85419 \times 10^{-12} \text{ F m}^{-1}$ ), and  $\varepsilon_r$  the local relative permittivity of the medium.  $\rho_{\text{pore}}^f$  and  $\rho_{\text{ion}}$  are the fixed (due to the pore) and mobile (due to the ions) charge distributions, respectively.

Multiplication of Eq. (S12) with the potential test function  $\psi$  and integration over the entire model  $\Omega = \Omega_w + \Omega_p + \Omega_m$  gives

$$\int_{\Omega} [\nabla \cdot \mathbf{D}] \psi d\Omega = - \int_{\Omega} [\rho_{\text{pore}}^f + \rho_{\text{ion}}] \psi d\Omega, \quad (\text{S13})$$

which, after applying the Gauss divergence theorem, yields the final weak formulation

$$\int_{\Omega} [\nabla \psi \cdot \mathbf{D}] d\Omega - \int_{\Gamma_{\text{PE}}} [\psi \mathbf{D} \cdot \mathbf{n}] d\Gamma_{\text{PE}} = \int_{\Omega} [\psi \rho_{\text{pore}}^f] d\Omega + \int_{\Omega} [\psi \rho_{\text{ion}}] d\Omega, \quad (\text{S14})$$

with boundaries  $\Gamma_{\text{PE}} = \Gamma_{w,c} + \Gamma_{w,t} + \Gamma_m$  and  $\mathbf{n}$  their normal vector. The boundary integrals at  $\Gamma_{w,c}$  and  $\Gamma_{w,t}$  are evaluated using the Dirichlet boundary conditions (BCs)  $\varphi = 0$  and  $\varphi = V_b$ , respectively. A zero charge BC,  $\mathbf{n} \cdot \mathbf{D} = 0$ , is used for the integral at  $\Gamma_m$ .

**Size-modified Nernst-Planck equation.** The total ionic flux  $\mathbf{J}_i$  of ion  $i$  at steady-state is expressed by the size-modified Nernst-Planck equation (smNPE)<sup>21</sup>

$$\frac{\partial c_i}{\partial t} = -\nabla \cdot \mathbf{J}_i = -\nabla \cdot (\mathcal{D}_i \nabla c_i + z_i \mu_i c_i \nabla \varphi + \mathcal{D}_i \boldsymbol{\beta}_i c_i - \mathbf{u} c_i), \quad (\text{S15})$$

where

$$\beta_i = \frac{a_i^3/a_0^3 \sum_j N_A a_j^3 \nabla c_j}{1 - \sum_j N_A a_j^3 c_j} , \quad (\text{S16})$$

and with ion diffusion coefficient  $\mathcal{D}_i$ , concentration  $c_i$ , charge number  $z_i$ , mobility  $\mu_i$ , electrostatic potential  $\varphi$ , steric saturation factor  $\beta_i$  and fluid velocity  $\mathbf{u}$ .  $N_A$  is Avogadro's constant ( $6.022 \times 10^{23} \text{ mol}^{-1}$ ) and  $a_i$  and  $a_0$  are the limiting cubic diameters for ions and water, respectively. Using the ion concentration test function  $d_i$ , the weak form of Eq. (S15) becomes

$$\begin{aligned} \int_{\Omega_w} \left[ \frac{\partial c_i}{\partial t} \right] d_i d\Omega_w &= \int_{\Omega_w} [-\nabla \cdot \mathbf{J}_i] d_i d\Omega_w \\ \int_{\Omega_w} \left[ d_i \frac{\partial c_i}{\partial t} \right] d\Omega_w &= \int_{\Omega_w} [\nabla d_i \cdot \mathbf{J}_i] d\Omega_w - \int_{\Gamma_{\text{NP}}} [d_i \mathbf{J}_i \cdot \mathbf{n}] d\Gamma_{\text{NP}} \\ &= \int_{\Omega_w} [\nabla d_i \cdot (\mathcal{D}_i \nabla c_i + z_i \mu_i c_i \nabla \varphi + \mathcal{D}_i \beta_i c_i - \mathbf{u} c_i)] d\Omega_w \\ &\quad - \int_{\Gamma_{\text{NP}}} [d_i (\mathcal{D}_i \nabla c_i + z_i \mu_i c_i \nabla \varphi + \mathcal{D}_i \beta_i c_i - \mathbf{u} c_i) \cdot \mathbf{n}] d\Gamma_{\text{NP}} . \end{aligned} \quad (\text{S17})$$

The integrals on the boundaries  $\Gamma_{\text{NP}} = \Gamma_{w,c} + \Gamma_{w,t} + \Gamma_{p+m}$  are evaluated using the Dirichlet boundary condition  $c_i = c_s$  for  $\Gamma_{w,c}$  and  $\Gamma_{w,t}$ , and the no flux boundary condition  $\mathbf{n} \cdot \mathbf{J}_i = 0$  for  $\Gamma_{p+m}$

**Variable density and viscosity Navier-Stokes equation.** The steady-state, laminar fluid flow of an incompressible fluid with a variable density and viscosity is given by the system of equations<sup>22</sup>

$$\mathbf{u} \cdot \nabla \varrho = 0 \quad (\text{S18})$$

$$(\mathbf{u} \cdot \nabla)(\varrho \mathbf{u}) + \nabla \cdot \sigma_{ij} = \mathbf{F}_{\text{ion}} \quad \text{with } \sigma_{ij} = p\mathbf{I} - \eta [\nabla \mathbf{u} + (\nabla \mathbf{u})^T] \quad (\text{S19})$$

$$\nabla \cdot (\varrho \mathbf{u}) - \mathbf{u} \cdot \nabla \varrho = 0 , \quad (\text{S20})$$

with fluid velocity  $\mathbf{u}$ , density  $\varrho$ , hydrodynamic stress tensor  $\sigma_{ij}$ , viscosity  $\eta$ , pressure  $p$  and body force  $\mathbf{F}_{\text{ion}}$ . The pressure test function  $q$  is used to derive the weak forms of Eq. (S18)

$$\int_{\Omega_w} [\mathbf{u} \cdot \nabla \varrho] q d\Omega_w = \int_{\Omega_w} [q \mathbf{u} \cdot \nabla \varrho] d\Omega_w = 0, \quad (\text{S21})$$

and Eq. (S20)

$$\begin{aligned} \int_{\Omega_w} [\nabla \cdot (\varrho \mathbf{u}) - \mathbf{u} \cdot \nabla \varrho] q d\Omega_w &= \int_{\Omega_w} [\nabla \cdot (\varrho \mathbf{u})] q d\Omega_w - \int_{\Omega_w} [q \mathbf{u} \cdot \nabla \varrho] d\Omega_w \\ &= \int_{\Omega_w} [\nabla q \cdot (\varrho \mathbf{u})] d\Omega_w - \int_{\Gamma_{\text{NS}}} [q (\varrho \mathbf{u}) \cdot \mathbf{n}] d\Gamma_{\text{NS}} \\ &\quad - \int_{\Omega_w} [q \mathbf{u} \cdot \nabla \varrho] d\Omega_w, \end{aligned} \quad (\text{S22})$$

while for Eq. (S19) we use the velocity test function  $\mathbf{v} = [v_r, v_\phi, v_z]$

$$\begin{aligned} \int_{\Omega_w} [(\mathbf{u} \cdot \nabla) (\varrho \mathbf{u}) + \nabla \cdot \sigma_{ij}] \cdot \mathbf{v} d\Omega_w &= \int_{\Omega_w} \mathbf{F} \cdot \mathbf{v} d\Omega_w \\ \int_{\Omega_w} [(\mathbf{u} \cdot \nabla) (\varrho \mathbf{u}) \cdot \mathbf{v}] d\Omega_w &= \int_{\Omega_w} \mathbf{F} \cdot \mathbf{v} d\Omega_w, \\ - \int_{\Omega_w} [\sigma_{ij} \cdot \nabla \mathbf{v}] d\Omega_w + \int_{\Gamma_{\text{NS}}} [\mathbf{v} \cdot \sigma_{ij} \cdot \mathbf{n}] d\Gamma_{\text{NS}} & \end{aligned} \quad (\text{S23})$$

with boundaries  $\Gamma_{\text{NS}} = \Gamma_{w,c} + \Gamma_{w,t} + \Gamma_{p+m}$ . The no-slip Dirichlet BC  $\mathbf{u} = 0$  is applied to  $\Gamma_{p+m}$ , and the no normal stress  $\sigma_{ij} \mathbf{n} = 0$  is used for  $\Gamma_{w,c}$  and  $\Gamma_{w,t}$ .

## 1.5 Estimating the bulk conductance of ClyA

The ionic current flowing through a nanopore can be estimated using Ohm's law

$$I(c_s, V_b) = G_{\text{bulk}}(c_s) V_b \quad (\text{S24})$$

with  $G_{\text{bulk}}$  the nanopore conductance and  $V_b$  the applied voltage. A naive estimate of  $G_{\text{bulk}}$  can be obtained by modelling it as a fluidic resistor, represented by a fluid-filled cylinder.<sup>23</sup>

Because ClyA has an asymmetric shape, it is best approximated by two resistors in series: a tall, wide cylinder (*cis lumen*) on top of a narrow short cylinder (*trans constriction*).<sup>1</sup> Hence,

$$G_{\text{bulk}}(c_s) = \frac{\sigma(c_s)\pi}{4} \left( \frac{l_{\text{cis}}}{d_{\text{cis}}^2} + \frac{l_{\text{trans}}}{d_{\text{trans}}^2} \right)^{-1}, \quad (\text{S25})$$

with  $\sigma$  the (concentration dependent) bulk electrolyte conductivity. The *cis* and *trans* chambers have heights and diameters of  $l_{\text{cis}} = 10 \text{ nm}$  and  $l_{\text{trans}} = 4 \text{ nm}$ , and  $d_{\text{cis}} = 6 \text{ nm}$  and  $d_{\text{trans}} = 3.3 \text{ nm}$ , respectively.<sup>1</sup>

## 2 Extended results

### 2.1 Effect of individual corrections to the ionic and water conductance

To estimate the influence to which each group of corrections (*i.e.*, the wall distance, concentration and steric effects) on the conductance properties of ClyA, we performed a set of simulations for the following conditions: ePNP-NS without wall distance corrections ( $\mathcal{D}_i^w = 1$ ,  $\mu_i^w = 1$ ,  $\eta^w = 1$ ), ePNP-NS without concentration-dependent corrections ( $\varepsilon_{r,f}^c = 1$ ,  $\mathcal{D}_i^c = 1$ ,  $\mu_i^c = 1$ ,  $\eta^c = 1$ ,  $\varrho^c = 1$ ), ePNP-NS without steric effect ( $\beta = 0$ ). For comparison, we plotted the relative ionic conductance (Fig. S6a) and the relative water conductance (Fig. S6b) of these models, normalized over the values obtained with the full ePNP-NS equations.

#### 2.1.1 Effect of disabling the wall distance corrections.

Disabling the wall distance corrections yields a higher ( $\approx 10\%$  increase) ionic conductance compared to the full ePNP-NS equations (Fig. S6a, blue curve). In effect, the implementation of the wall distance corrections results in a smaller effective pore size. The influence on the water flow is stronger, with the reduction of the viscosity near the wall giving rise to a 25 % to 50 % increase in the water flow (Fig. S6b, blue curve).

#### 2.1.2 Effect of disabling the concentration corrections.

The removal of the concentration-dependent corrections has a large influence on the simulated results. The ionic conductance increases dramatically: from 5 %, 13 %, 29 % and 152 % at 0.005 M, 0.05 M, 0.5 M and 5 M, respectively (Fig. S6a, red curve). This is expected however, given that the large reduction of both diffusion coefficients and ionic mobilities with increasing salt concentrations is not taken into account. The influence on the water flow shows only a limited effect from 0.005 M (9 % decrease) to 1 M (2 % increase), followed by a rapid increase of 82 % between 1 M and 5 M (Fig. S6b, red curve). This is a direct

result of the 15 % increase of the electrolyte viscosity between 1 M to 5 M, compared to the mere 5 % increase between 0 M to 1 M (Fig. S3a).

### 2.1.3 Effect of disabling the steric corrections.

The steric corrections appear to have little influence on the ionic conductance, with a maximum deviation of at most  $\pm 3\%$  over the entire concentration range (Fig. S6a, brown curve).

The effect on the water flow is larger, with a decrease of 10 % at 0.5 M (Fig. S6b, brown

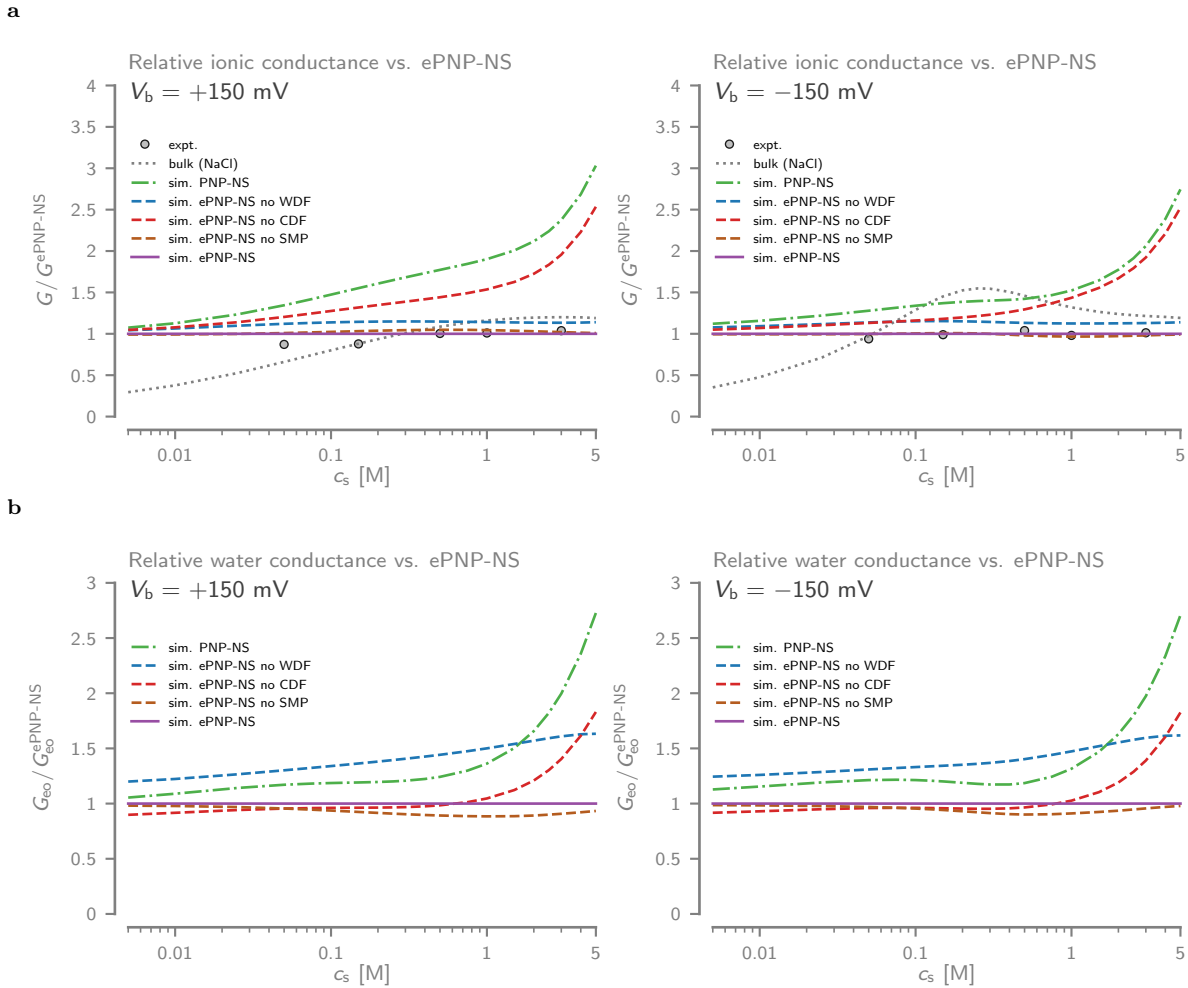

**Figure S6. Effect of individual corrections on the simulated ionic and water conductance.** (a) The ionic conductance  $G = I/V_b$  and (b) the water conductance  $G_{eo} = Q_{eo}/V_b$  of ClyA-AS at 150 mV (left) and  $-150$  mV (right), normalized over the values of the ePNP-NS equations. Comparison between the experimental data (expt.), the simple resistor model (bulk, Eq. (S25)), classic PNP-NS (sim. PNP-NS), ePNP-NS without wall distance corrections (sim. ePNP-NS no WDF:  $\mathcal{D}_i^w = 1$ ,  $\mu_i^w = 1$ ,  $\eta^w = 1$ ), ePNP-NS without concentration-dependent corrections (sim. ePNP-NS no CDF:  $\varepsilon_{r,f}^c = 1$ ,  $\mathcal{D}_i^c = 1$ ,  $\mu_i^c = 1$ ,  $\eta^c = 1$ ,  $\varrho^c = 1$ ), ePNP-NS without steric effect (sim. ePNP-NS no SMP:  $\beta = 0$ ) and full ePNP-NS.

curve). By placing an upper limit on the total ion concentration ( $\approx 13.3$  M in our case), the steric corrections prevent excessive screening of fixed charges by unphysical ionic strengths (*i.e.*, concentrations that would require fitting more ions into a given space than what is physically possible). This is an essential mechanic that allows one to realistically model the electrical double layer near surfaces with high charge densities—as is the case for most biological nanopores.

## 2.2 Tabulated ion selectivities

Tabulated data on the ion selectivity, in terms of cation transport number  $t_{\text{Na}^+}$  and cation permeability ratio  $P_{\text{Na}^+}$  for various salt concentrations and voltages can be found in Tab. S3.

**Table S3.** Tabulated cation transport numbers and permeability ratios.

| $c_s$ [M] | $V_b$ [mV]          |                     |                     |                     |                     |                     |
|-----------|---------------------|---------------------|---------------------|---------------------|---------------------|---------------------|
|           | +150                |                     | +100                |                     | +50                 |                     |
|           | $t_{\text{Na}^+}^a$ | $P_{\text{Na}^+}^b$ | $t_{\text{Na}^+}^a$ | $P_{\text{Na}^+}^b$ | $t_{\text{Na}^+}^a$ | $P_{\text{Na}^+}^b$ |
| 0.005     | 0.996               | 235                 | 0.997               | 313                 | 0.998               | 410                 |
| 0.050     | 0.906               | 9.62                | 0.925               | 12.3                | 0.941               | 16.0                |
| 0.150     | 0.786               | 3.68                | 0.805               | 4.13                | 0.824               | 4.69                |
| 0.500     | 0.642               | 1.79                | 0.649               | 1.85                | 0.657               | 1.91                |
| 1.000     | 0.566               | 1.30                | 0.569               | 1.32                | 0.572               | 1.33                |
| 2.000     | 0.502               | 1.00                | 0.503               | 1.01                | 0.503               | 1.01                |
| 5.000     | 0.445               | 0.803               | 0.445               | 0.803               | 0.445               | 0.803               |

  

| $c_s$ [M] | $V_b$ [mV]          |                     |                     |                     |                     |                     |
|-----------|---------------------|---------------------|---------------------|---------------------|---------------------|---------------------|
|           | +150                |                     | +100                |                     | +50                 |                     |
|           | $t_{\text{Na}^+}^a$ | $P_{\text{Na}^+}^b$ | $t_{\text{Na}^+}^a$ | $P_{\text{Na}^+}^b$ | $t_{\text{Na}^+}^a$ | $P_{\text{Na}^+}^b$ |
| 0.005     | 0.998               | 500                 | 0.998               | 535                 | 0.998               | 542                 |
| 0.050     | 0.967               | 29.6                | 0.966               | 28.2                | 0.962               | 25.1                |
| 0.150     | 0.882               | 7.51                | 0.874               | 6.91                | 0.860               | 6.16                |
| 0.500     | 0.687               | 2.20                | 0.680               | 2.12                | 0.672               | 2.05                |
| 1.000     | 0.582               | 1.39                | 0.579               | 1.38                | 0.577               | 1.36                |
| 2.000     | 0.505               | 1.02                | 0.505               | 1.02                | 0.504               | 1.02                |
| 5.000     | 0.445               | 0.802               | 0.445               | 0.802               | 0.445               | 0.802               |

<sup>a</sup>Cation transport number  $t_{\text{Na}^+} = G_{\text{Na}^+}/(G_{\text{Na}^+} + G_{\text{Cl}^-})$ ; <sup>b</sup>Cation permeability ratio  $P_{\text{Na}^+} = G_{\text{Na}^+}/(G_{\text{Cl}^-})$ .

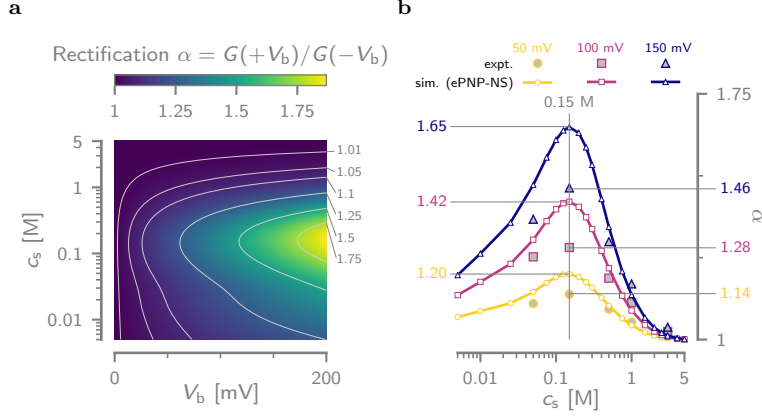

**Figure S7. Measured and simulated ionic rectification of single ClyA nanopores.** (a) Contourplot of the ionic current rectification  $\alpha = G(+V_b)/G(-V_b)$ , computed from the ionic conductances in the ePNP-NS simulation, as a function of  $V_b$  and  $c_s$ . (b) Comparison between the simulated (ePNP-NS) and measured (expt.)  $\alpha$  as a function of  $c_s$  for 50 mV, 100 mV and 150 mV.

## 2.3 Ionic current rectification

The ionic current rectification (ICR,  $\alpha$ , Fig. S7) represents the relative conductivity of the nanopore at identical, but opposing bias voltages

$$\alpha(V_b) = \frac{G(+V_b)}{G(-V_b)}, \text{ with } V_b \geq 0.$$

Hence, for  $\alpha > 0$ , the current is higher at positive bias voltages, and vice versa for  $\alpha < 0$ . The ICR phenomenon results from an asymmetry in the ionic conductance pathways (*e.g.*, moving from *cis* to *trans* is not equivalent as moving from *trans* to *cis*). In turn, this stems from the intrinsic asymmetries of the nanopore itself (*i.e.*, geometry and charge distribution) or its response to the electric field (*i.e.*, gating or electrostriction).

The heatmap of the simulated (ePNP-NS)  $\alpha$  (Fig. S7a) reveals that  $\alpha > 0$  between 0 mV to 200 mV and 0.005 M to 5 M. It increases monotonically with increasing bias voltage and exhibits a maximum as a function of salt concentration at  $\approx 0.15$  M. The concentration dependency of  $\alpha$  at 50 mV, 100 mV and 150 mV (Fig. S7b) shows that it increases monotonically with  $c_s$  until it reaches a peak value, after which it decreases to approach unity ( $\alpha = 1$ ) at saturating salt concentrations ( $c_s \approx 5$  M). Even though the values produced by

the ePNP-NS simulations do not fully match quantitatively to the experimental results, at least for  $c_s < 0.5$  M, they do (1) reproduce the observed trends qualitatively and (2) exhibit much smaller errors relative to the PNP-NS results (data not shown).

## 2.4 Peak values of the radial potential profiles inside ClyA

The peak values of the radial electrostatic potential  $\langle\varphi\rangle_{\text{rad}}$  at the *cis* entry, middle of the lumen and the *trans* constriction for 0.005 M, 0.05 M, 0.15 M, 0.5 M and 5 M NaCl are summarized in Tab. S4.

**Table S4.** Peak radial potential.

| $c_s$ [M] | $\langle\varphi\rangle_{\text{rad}}$ [mV] |                           |                                  |
|-----------|-------------------------------------------|---------------------------|----------------------------------|
|           | <i>cis</i><br>$z \approx 10$ nm           | lumen<br>$z \approx 5$ nm | <i>trans</i><br>$z \approx 0$ nm |
| 0.005     | −80                                       | −108                      | −144                             |
| 0.05      | −34                                       | −50                       | −86                              |
| 0.15      | −19                                       | −29                       | −57                              |
| 0.5       | −9.3                                      | −14                       | −30                              |
| 5         | −1.9                                      | −1.7                      | −4.2                             |

## 2.5 Comparison of the *lumen* diameters

A comparison of the ClyA structures equilibrated with molecular dynamics with the crystal (PDBID: 2WCD<sup>24</sup>) and cryo-EM (PDBID: 6MRT<sup>25</sup>) structures can be found in Fig. S8. The molecular surface was colored according to the internal radius  $r_{\text{int}}$

$$r_{\text{int},i} = \sqrt{(x_i^2 + y_i^2)} - r_{\text{vdW},i} \quad (\text{S26})$$

with  $x_i$ ,  $y_i$  and  $r_{\text{vdW},i}$  the  $x$ -coordinate,  $y$ -coordinate and van der Waals radius of atom  $i$ . All structure were aligned to minimize their RMSD to the initial structure, which has its center of mass at  $(0, 0, 55)$ .

Our comparison shows that the MD structure does not deviate significantly from the

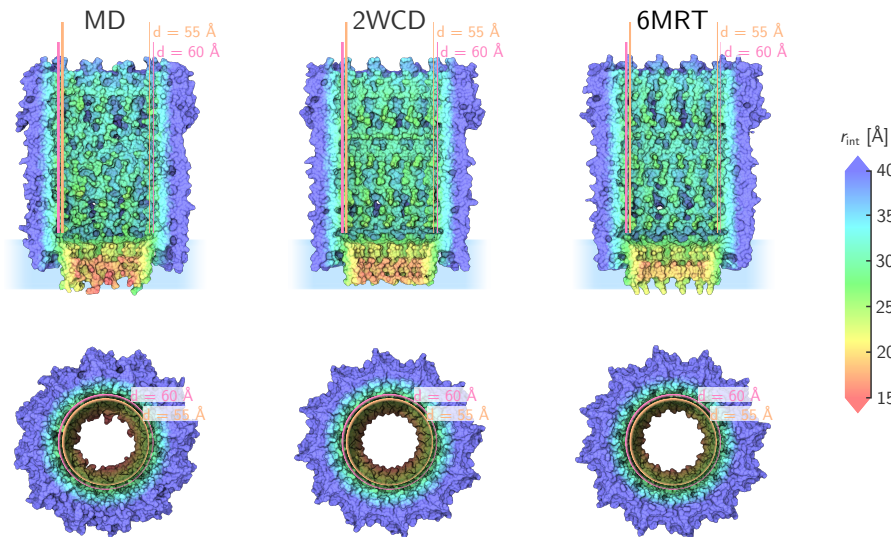

**Figure S8. Lumen diameters of ClyA.** Side and top view of the molecular surface of the ClyA-AS equilibrated with molecular dynamics (MD, left), with the crystal PDBID: 2WCD<sup>24</sup> (middle) and cryo-EM PDBID: 6MRT<sup>25</sup> (right) structures. Surfaces were colored according to  $r_{\text{int}}$ , the distance of each atom from the central axis of the pore, reduced with its van der Waals radius (Eq. (S26)). The traditional diameter of 5.5 nm and the 6.0 nm are outlined in orange and pink respectively. Images were rendered using VMD.<sup>26</sup>

crystal and cryo-EM structures in overall geometry. Moreover, the average nanopore diameter in the *cis lumen* is closer to 6 nm than the 5.5 nm reported earlier<sup>27</sup>. The value of 5.5 nm should be considered as a measure for the maximum size of a protein that can fit inside dodecameric ClyA without it touching the walls. The 6 nm diameter value given is the average *lumen* diameter, which is slightly larger than 5.5 nm given that it includes—rather than excludes—all corrugations.

## 2.6 Per-residue B-factors of the molecular dynamics trajectory

Even though the main chain heavy atoms of ClyA were harmonically restrained during the entire MD run, all other atoms were allowed to move freely. This allowed us to sample the conformational landscape of all the ClyA side chains without disrupting the overall structure of the pore and to generate a well-averaged geometry and charge distribution. These thermal

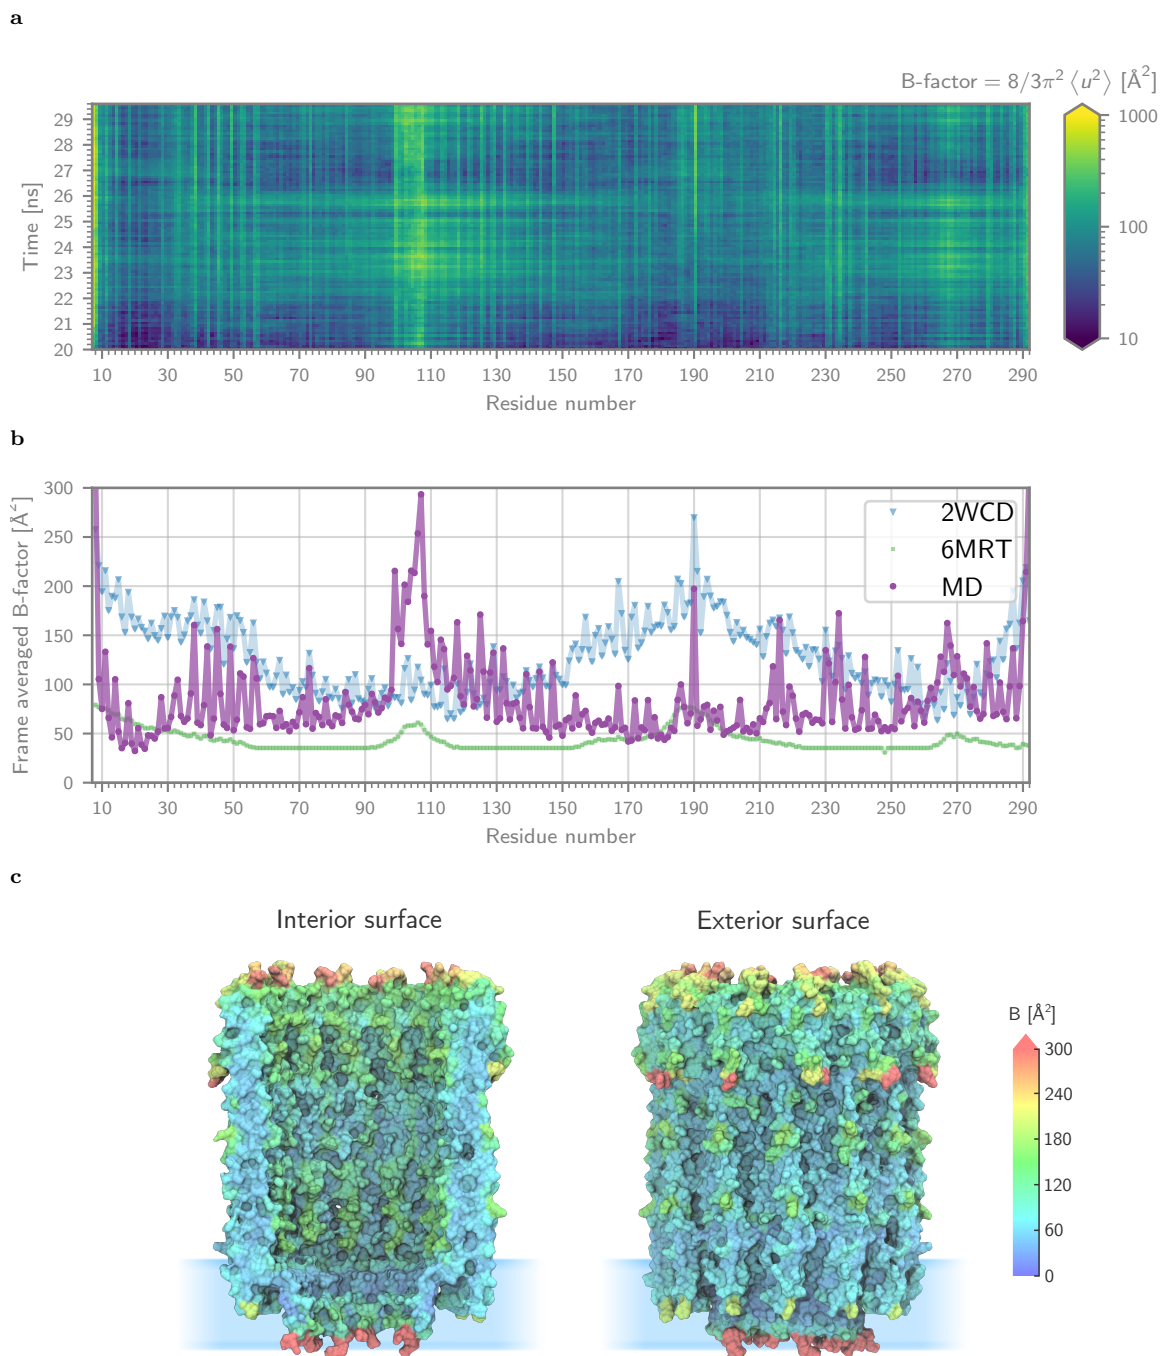

**Figure S9. Per-residue B-factors for the last 10 ns of the MD run.** (a) Heatmap of the per-residue B-factor ( $B$ , Eq. (S27)) of ClyA-AS, averaged over all 12 monomers, as determined by our MD simulation. (b) The data from the heatmap, averaged over all frames and plotted together with the B-factors given by the crystal (PDBID: 2WCD<sup>24</sup> and cryo-EM PDBID: 6MRT<sup>25</sup>) structures of the ClyA dodecamer. (c) Molecular surface plots of the interior (left) and exterior (right) walls of ClyA-AS, colored according to the chain-averaged per-residue B-factor. Images were rendered using VMD.<sup>26</sup>

fluctuations can be quantified with the temperature factor or *B-factor*<sup>28</sup> ( $B_i$ )

$$B_i = \frac{8}{3}\pi^2 \langle u_i^2 \rangle , \quad (\text{S27})$$

which can be computed for each atom  $i$  from its mean-square displacement (MSD)  $\langle u_i^2 \rangle$ . Starting from the last 10 ns of our 30 ns MD trajectory, we computed the  $\langle u_i^2 \rangle$  using the fast QCP algorithm,<sup>29,30</sup> as implemented in the ‘MDAnalysis’ Python package.<sup>31</sup> A heatmap of the resulting B-factors for each residue, averaged over all 12 monomers of ClyA, can be found in Fig. S9a. In addition, we plotted the frame-averaged B-factor (Fig. S9b), allowing us to compare the flexibility observed in the MD trajectory with the B-factors given by the dodecamer ClyA crystal (PDBID: 2WCD<sup>24</sup>) and cryo-EM (PDBID: 6MRT<sup>25</sup>) structures. Interestingly,  $B_i$  of our MD simulation does not show much agreement with the original 2WCD crystal structure, but it reproduces the more flexible regions observed in the (newer) 6MRT cryo-EM structure (*i.e.*, residue numbers 7 to 20, 95 to 105, 180 to 200 and 260 to 280). Peng and coworkers also started from the 2WCD crystal structure to generate their refined 6MRT model, albeit using a high resolution cryo-EM map as a restraint. Hence, the similarities in flexibility between our model and 6MRT are encouraging that the MD relaxes the structure properly. Finally, we also visualized the the MD  $B_i$  on the interior and exterior molecular surface of ClyA-AS (Fig. S9c). This shows that the most flexible regions are the *cis* and *trans* entries of the pore.

## References

- (1) Soskine, M.; Biesemans, A.; De Maeyer, M.; Maglia, G. Tuning the Size and Properties of ClyA Nanopores Assisted by Directed Evolution. *J. Am. Chem. Soc.* **2013**, *135*, 13456–63.
- (2) Newville, M.; Stensitzki, T.; Allen, D. B.; Ingargiola, A. LMFIT: Non-Linear Least-Square Minimization and Curve-Fitting for Python. 2014; <https://zenodo.org/record/11813>.
- (3) Mills, R.; Lobo, V. *Self-Diffusion in Electrolyte Solutions: A Critical Examination of Data Compiled from the Literature*; Physical Sciences Data v. 36; Elsevier, 1989.
- (4) Estes, M. A.; Chan, C.-Y.; Spiro, M. Examination of a transference number anomaly: 0.02 mol dm<sup>-3</sup> aqueous sodium chloride at 25°C. *J. Chem. Soc. Faraday Trans.* **1976**, *72*, 1425.
- (5) Haynes, W.; Lide, D.; Bruno, T. CRC Handbook of Chemistry and Physics, 97th edn, Vol. 2016–2017. 2017.
- (6) Della Monica, M.; Petrella, G.; Sacco, A.; Bufo, S. Transference Numbers in Concentrated Sodium Chloride Solutions. *Electrochim. Acta* **1979**, *24*, 1013–1017.
- (7) Panopoulos, D. K.; Kaneko, H.; Spiro, M. Transference Numbers of Sodium Chloride in Concentrated Aqueous Solutions and Chloride Conductances in Several Concentrated Electrolyte Solutions. *J. Solution Chem.* **1986**, *15*, 243–252.
- (8) Schönert, H. Transference Numbers in the H<sub>2</sub>O + NaCl + MgCl<sub>2</sub> System at T = 298.15 K, Determined in a Five-Compartment Hittorf Cell. *J. Solution Chem.* **2013**, *43*, 26–39.
- (9) Bianchi, H.; Corti, H. R.; Fernández-Prini, R. The Conductivity of Concentrated Aqueous Mixtures of NaCl and MgCl<sub>2</sub> at 25°C. *J. Solution Chem.* **1989**, *18*, 485–491.
- (10) Currie, D. J.; Gordon, A. R. Transference Numbers for Concentrated Aqueous Sodium Chloride Solutions, and the Ionic Conductances for Potassium and Sodium Chlorides. *J. Phys. Chem.* **1960**, *64*, 1751–1753.
- (11) Goldsack, D. E.; Franchetto, R.; Franchetto, A. A. Solvation Effects on the Conductivity of Concentrated Electrolyte Solutions. *Can. J. Chem.* **1976**, *54*, 2953–2966.

- (12) Gavish, N.; Promislow, K. Dependence of the Dielectric Constant of Electrolyte Solutions on Ionic Concentration: A Microfield Approach. *Phys. Rev. E* **2016**, *94*, 012611.
- (13) Buchner, R.; Hefter, G. T.; May, P. M. Dielectric Relaxation of Aqueous NaCl Solutions. *J. Phys. Chem. A* **1999**, *103*, 1–9.
- (14) Hai-Lang, Z.; Shi-Jun, H. Viscosity and Density of Water + Sodium Chloride + Potassium Chloride Solutions at 298.15 K. *J. Chem. Eng. Data* **1996**, *41*, 516–520.
- (15) Simakov, N. A.; Kurnikova, M. G. Soft Wall Ion Channel in Continuum Representation with Application to Modeling Ion Currents in  $\alpha$ -Hemolysin. *J. Phys. Chem. B* **2010**, *114*, 15180–90.
- (16) Makarov, V.; Feig, M.; Andrews, B.; Pettitt, B. Diffusion of Solvent around Biomolecular Solutes: A Molecular Dynamics Simulation Study. *Biophys. J.* **1998**, *75*, 150–158.
- (17) Wilson, J.; Sarthak, K.; Si, W.; Gao, L.; Aksimentiev, A. Rapid and Accurate Determination of Nanopore Ionic Current Using a Steric Exclusion Model. *ACS Sensors* **2019**, *4*, 634–644.
- (18) Pederson, E. D.; Barbalas, J.; Drown, B. S.; Culbertson, M. J.; Keranen Burden, L. M.; Kasianowicz, J. J.; Burden, D. L. Proximal Capture Dynamics for a Single Biological Nanopore Sensor. *J. Phys. Chem. B* **2015**, *119*, 10448–55.
- (19) Rigo, E.; Dong, Z.; Park, J. H.; Kennedy, E.; Hokmabadi, M.; Almonte-Garcia, L.; Ding, L.; Aluru, N.; Timp, G. Measurements of the size and correlations between ions using an electrolytic point contact. *Nat. Commun.* **2019**, *10*.
- (20) Pronk, S.; Lindahl, E.; Kasson, P. M. Dynamic Heterogeneity Controls Diffusion and Viscosity Near Biological Interfaces. *Nat. Commun.* **2014**, *5*, 3034.
- (21) Lu, B.; Hoogerheide, D. P.; Zhao, Q.; Yu, D. Effective Driving Force Applied on DNA Inside a Solid-State Nanopore. *Phys. Rev. E* **2012**, *86*, 011921.
- (22) Axelsson, O.; He, X.; Neytcheva, M. Numerical Solution of the Time-Dependent Navier–Stokes Equation for Variable Density–Variable Viscosity. Part I. *Math. Model. Anal.* **2015**, *20*, 232–260.

- (23) Kowalczyk, S. W.; Grosberg, A. Y.; Rabin, Y.; Dekker, C. Modeling the Conductance and DNA Blockade of Solid-State Nanopores. *Nanotechnology* **2011**, *22*, 315101.
- (24) Mueller, M.; Grauschopf, U.; Maier, T.; Glockshuber, R.; Ban, N. The Structure of a Cytolytic Alpha-Helical Toxin Pore Reveals Its Assembly Mechanism. *Nature* **2009**, *459*, 726–30.
- (25) Peng, W.; de Souza Santos, M.; Li, Y.; Tomchick, D. R.; Orth, K. High-resolution cryo-EM structures of the *E. coli* hemolysin ClyA oligomers. *PLOS ONE* **2019**, *14*, e0213423.
- (26) Humphrey, W.; Dalke, A.; Schulten, K. VMD: Visual Molecular Dynamics. *J. Mol. Graph.* **1996**, *14*, 33–38.
- (27) Willems, K.; Ruić, D.; Biesemans, A.; Galenkamp, N. S.; Dorpe, P. V.; Maglia, G. Engineering and Modeling the Electrophoretic Trapping of a Single Protein Inside a Nanopore. *ACS Nano* **2019**, *13*, 9980–9992.
- (28) Bahar, I.; Atilgan, A. R.; Erman, B. Direct evaluation of thermal fluctuations in proteins using a single-parameter harmonic potential. *Fold. Des.* **1997**, *2*, 173–181.
- (29) Theobald, D. L. Rapid calculation of RMSDs using a quaternion-based characteristic polynomial. *Acta Crystallogr. A* **2005**, *61*, 478–480.
- (30) Liu, P.; Agrafiotis, D. K.; Theobald, D. L. Fast determination of the optimal rotational matrix for macromolecular superpositions. *J. Comput. Chem.* **2009**, n/a–n/a.
- (31) Michaud-Agrawal, N.; Denning, E. J.; Woolf, T. B.; Beckstein, O. MDAAnalysis: A toolkit for the analysis of molecular dynamics simulations. *J. Comput. Chem.* **2011**, *32*, 2319–2327.
